# Supplementary material for: Shifts in stream hydrochemistry in responses to typhoon and non-typhoon precipitation
Source: Copernicus journal article supplement (doi:10.5194/bg-15-2379-2018), 2018-04-19
Supplement: Supplementary file 1 [file bg-15-2379-2018-supplement.zip]

## **Shifts in stream hydrochemistry in responses to typhoon and non-typhoon precipitation**

5 Chung-Te Chang<sup>1</sup>, Jr-Chuan Huang<sup>1</sup>, Lixin Wang<sup>2</sup>, Yu-Ting Shih<sup>1</sup>, and Teng-Chiu Lin<sup>3</sup>

<sup>1</sup>Department of Geography, National Taiwan University, No 1 Section.4, Roosevelt Road, Taipei 10617, Taiwan

<sup>2</sup>Department of Earth Sciences, Indiana University-Purdue University Indianapolis, Indianapolis, IN 46202, USA

<sup>3</sup>Department of Life Science, National Taiwan Normal University, No 88 Section 4, Ting-Chow Road, Taipei 11677, Taiwan

*Correspondence to:* Teng-Chiu Lin (tclin@ntnu.edu.tw)

**Table S1.** The basic information of the typhoon affected weeks.

| Name of typhoons | Date            | Precipitation between the first and last typhoon warnings (mm, A) | Total precipitation of the typhoon week (mm, B) | C = A/B (%) | Discharge between the first and last typhoon warnings (mm, D) | Total discharge of the typhoon week (mm, E) | F = D/E (%) |
|------------------|-----------------|-------------------------------------------------------------------|-------------------------------------------------|-------------|---------------------------------------------------------------|---------------------------------------------|-------------|
| Jelawat          | 26-29 Sep. 2012 | 181                                                               | 184                                             | 98          | 106                                                           | 132                                         | 80          |
| Soulik           | 12-14 Jul. 2013 | 334                                                               | 345                                             | 97          | 212                                                           | 256                                         | 83          |
| Trami            | 20-22 Aug. 2013 | 296                                                               | 321                                             | 92          | 230                                                           | 252                                         | 91          |
| Kong-Rey         | 28-30 Aug. 2013 | 258                                                               | 286                                             | 90          | 187                                                           | 205                                         | 91          |
| Usagi            | 20-22 Sep. 2013 | 265                                                               | 304                                             | 87          | 159                                                           | 195                                         | 82          |
| Fitow            | 5-7 Oct. 2013   | 305                                                               | 324                                             | 94          | 191                                                           | 229                                         | 83          |
| Matmo            | 22-23 Jul. 2014 | 170                                                               | 184                                             | 92          | 145                                                           | 167                                         | 87          |
| Fung-Wong        | 20-23 Sep. 2014 | 180                                                               | 187                                             | 96          | 112                                                           | 120                                         | 93          |
| Chan-Hom         | 9-11 Jul. 2015  | 243                                                               | 252                                             | 96          | 157                                                           | 185                                         | 85          |
| Soudelor         | 7-9 Aug. 2015   | 470                                                               | 507                                             | 93          | 380                                                           | 446                                         | 85          |
| Goni             | 21-24 Aug. 2015 | 160                                                               | 168                                             | 95          | 112                                                           | 122                                         | 92          |
| Average          |                 | 260                                                               | 278                                             | 93          | 181                                                           | 210                                         | 86          |

1. The accumulated precipitation of typhoons were summed from first and last typhoon warnings issued and the total precipitation (mm) of typhoon week is the average value of two rain gauges (COA530 and COA540) during the week of typhoon influenced, and same as the discharge (the average value of four watersheds, A1, A2, F1, and F2). Precipitation was recorded at a 5-min interval at the two rain gauge stations and aggregated to weekly and typhoon precipitation.

**Table S2.** The significant regression models between stream discharge (x) and ion budgets (y) for non-typhoon, typhoon and all data, respectively (referring to plots in Figs. 5 and 6).

| Ions                          |             | A1                                     | A2                                     | F1                                     | F2                                    |
|-------------------------------|-------------|----------------------------------------|----------------------------------------|----------------------------------------|---------------------------------------|
| Na <sup>+</sup>               | Non-typhoon | $y = 0.034x + 0.022, R^2 = 0.26^{**}$  | $y = 0.035x - 0.31, R^2 = 0.32^{**}$   | $y = 0.038x - 0.54, R^2 = 0.43^{**}$   | $y = 0.035x + 0.13, R^2 = 0.46^{**}$  |
|                               | Typhoon     |                                        | $y = -0.101x + 21.59, R^2 = 0.37^{**}$ | $y = -0.78x + 13.29, R^2 = 0.50^*$     | $y = -0.10x + 25.24, R^2 = 0.74^{**}$ |
|                               | All data    |                                        |                                        |                                        | $y = -0.019x + 2.91, R^2 = 0.15^{**}$ |
| K <sup>+</sup>                | Non-typhoon | $y = 0.009x - 0.07, R^2 = 0.65^{**}$   | $y = 0.006x - 0.10, R^2 = 0.53^{**}$   | $y = 0.004x - 0.15, R^2 = 0.37^{**}$   | $y = 0.003x - 0.07, R^2 = 0.30^{**}$  |
|                               | Typhoon     |                                        |                                        |                                        | $y = -0.014x + 3.21, R^2 = 0.71^{**}$ |
|                               | All data    | $y = 0.005x + 0.08, R^2 = 0.39^{**}$   | $y = 0.002x + 0.08, R^2 = 0.17^{**}$   |                                        | $y = -0.003x + 0.25, R^2 = 0.19^{**}$ |
| Ca <sup>2+</sup>              | Non-typhoon | $y = 0.044x + 0.51, R^2 = 0.95^{**}$   | $y = 0.025x + 0.28, R^2 = 0.90^{**}$   | $y = 0.022x + 0.26, R^2 = 0.91^{**}$   | $y = 0.039x + 0.45, R^2 = 0.85^{**}$  |
|                               | Typhoon     | $y = 0.030x + 3.19, R^2 = 0.42^{**}$   | $y = 0.009x + 3.73, R^2 = 0.17^{**}$   | $y = 0.022x + 0.66, R^2 = 0.79^{**}$   |                                       |
|                               | All data    | $y = 0.043x + 0.65, R^2 = 0.92^{**}$   | $y = 0.023x + 0.41, R^2 = 0.85^{**}$   | $y = 0.023x + 0.24, R^2 = 0.89^{**}$   | $y = 0.026x + 1.14, R^2 = 0.76^{**}$  |
| Mg <sup>2+</sup>              | Non-typhoon | $y = 0.023x + 0.20, R^2 = 0.91^{**}$   | $y = 0.015x + 0.13, R^2 = 0.82^{**}$   | $y = 0.012x + 0.07, R^2 = 0.75^{**}$   | $y = 0.018x + 0.18, R^2 = 0.83^{**}$  |
|                               | All data    | $y = 0.020x + 0.36, R^2 = 0.83^{**}$   | $y = 0.012x + 0.26, R^2 = 0.72^{**}$   | $y = 0.009x + 0.28, R^2 = 0.59^{**}$   | $y = 0.011x + 0.53, R^2 = 0.72^{**}$  |
| NH <sub>4</sub> <sup>+</sup>  | Typhoon     | $y = -0.006x + 0.86, R^2 = 0.57^*$     | $y = -0.004x + 0.50, R^2 = 0.48^*$     | $y = -0.005x + 0.53, R^2 = 0.66^*$     | $y = -0.009x + 1.56, R^2 = 0.88^{**}$ |
|                               | All data    |                                        |                                        |                                        | $y = -0.003x + 0.05, R^2 = 0.35^*$    |
| Cl <sup>-</sup>               | Non-typhoon | $y = 0.032x - 0.57, R^2 = 0.07^{**}$   | $y = 0.042x - 1.08, R^2 = 0.10^*$      | $y = 0.045x - 1.50, R^2 = 0.25^{**}$   | $y = 0.030x - 0.23, R^2 = 0.19^{**}$  |
| NO <sub>3</sub> <sup>-</sup>  | Non-typhoon | $y = 0.127x - 0.97, R^2 = 0.93^{**}$   | $y = 0.094x - 0.92, R^2 = 0.91^{**}$   | $y = 0.014x - 0.98, R^2 = 0.23^{**}$   |                                       |
|                               | All data    | $y = 0.112x - 0.005, R^2 = 0.75^{**}$  | $y = 0.087x + 0.45, R^2 = 0.82^{**}$   | $y = 0.014x - 0.91, R^2 = 0.31^{**}$   | $y = 0.005x - 0.35, R^2 = 0.15^{**}$  |
| SO <sub>4</sub> <sup>2-</sup> | Non-typhoon | $y = 0.049x + 0.63, R^2 = 0.58^{**}$   | $y = 0.022x - 0.26, R^2 = 0.19^{**}$   | $y = 0.026x - 0.36, R^2 = 0.31^{**}$   | $y = 0.052x + 0.41, R^2 = 0.55^{**}$  |
|                               | All data    | $y = 0.046x + 0.93, R^2 = 0.46^{**}$   | $y = 0.011x - 0.16, R^2 = 0.25^{**}$   | $y = 0.023x + 0.06, R^2 = 0.32^{**}$   | $y = 0.032x + 1.43, R^2 = 0.28^{**}$  |
| PO <sub>4</sub> <sup>3-</sup> | Non-typhoon |                                        |                                        | $y = 0.0001x - 0.008, R^2 = 0.09^{**}$ |                                       |
|                               | Typhoon     | $y = -0.0001x + 0.06, R^2 = 0.62^{**}$ | $y = -0.005x + 0.08, R^2 = 0.41^{**}$  | $y = -0.0005x + 0.07, R^2 = 0.68^{**}$ |                                       |
|                               | All data    | $y = -0.0001x + 0.005, R^2 = 0.05^*$   | $y = -0.0001x + 0.004, R^2 = 0.07^*$   | $y = -0.0001x + 0.006, R^2 = 0.13^*$   |                                       |

P-value: \* < 0.05 < \*\* < 0.01.

**Table S3.** The mean (one standard deviation) concentrations of ions (mg/l) in precipitation during non-typhoon and typhoon periods.

|             | H           | Na <sup>+</sup> | K <sup>+</sup> | Ca <sup>2+</sup> | Mg <sup>2+</sup> | NH <sub>4</sub> <sup>+</sup> | Cl <sup>-</sup> | NO <sub>3</sub> <sup>-</sup> | SO <sub>4</sub> <sup>2-</sup> | PO <sub>4</sub> <sup>3-</sup> |
|-------------|-------------|-----------------|----------------|------------------|------------------|------------------------------|-----------------|------------------------------|-------------------------------|-------------------------------|
| <b>A1</b>   |             |                 |                |                  |                  |                              |                 |                              |                               |                               |
| Non-typhoon | 0.06 (0.06) | 4.15 (8.35)     | 0.64 (1.36)    | 0.84 (1.36)      | 0.59 (1.04)      | 0.85 (1.35)                  | 9.43 (22.9)     | 3.97 (6.27)                  | 5.18 (7.26)                   | 0.04 (0.15)                   |
| Typhoon     | 0.02 (0.02) | 3.78 (3.51)     | 0.43 (0.45)    | 0.48 (0.36)      | 0.51 (0.41)      | 0.12 (0.14)                  | 6.05 (5.21)     | 0.40 (0.70)                  | 1.54 (1.57)                   | 0.01 (0.02)                   |
| <b>F2</b>   |             |                 |                |                  |                  |                              |                 |                              |                               |                               |
| Non-typhoon | 0.04 (0.06) | 3.37 (8.17)     | 0.61 (1.66)    | 0.84 (1.91)      | 0.55 (1.08)      | 0.55 (1.18)                  | 7.96 (23.9)     | 2.56 (9.10)                  | 4.84 (10.2)                   | 0.01 (0.05)                   |
| Typhoon     | 0.01 (0.02) | 3.36 (2.75)     | 0.37 (0.39)    | 0.32 (0.23)      | 0.46 (0.36)      | 0.14 (0.17)                  | 5.03 (3.96)     | 0.39 (0.53)                  | 2.11 (2.80)                   | 0.002 (0.003)                 |
