# Supplementary material for: Shifts in stream hydrochemistry in responses to typhoon and non-typhoon precipitation
Source: Copernicus journal article supplement (doi:10.5194/bg-15-2379-2018), 2018-04-19
Supplement: Supplementary file 2 [file bg-15-2379-2018-supplement.zip]

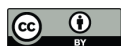

## *Supplement of*

# **Shifts in stream hydrochemistry in responses to typhoon and non-typhoon precipitation**

**Chung-Te Chang et al.**

*Correspondence to:* Teng-Chiu Lin (tclin@ntnu.edu.tw)

- bg-15-2379-2018-supplement-title-page.pdf
- Four watersheds\_weekly precipitation (PP) and Discharge (QQ).xlsx
- Precipitation and streamwater chemistry data.xlsx
- bg-2017-394-supplement-version3.pdf

The copyright of individual parts of the supplement might differ from the CC BY 4.0 License.
